# Supplementary material for: Citric acid modified Ni3P as a catalyst for aqueous phase reforming and hydrogenolysis of glycerol to 1,2-PDO
Source: Royal Society of Chemistry journal article supplement (doi:10.1039/d1nj04179g), 2021-01-01
Supplement: d1nj04179g1.pdf [file d1nj04179g1.pdf]

# Citric acid modified Ni<sub>3</sub>P as a catalyst for aqueous phase reforming and hydrogenolysis of glycerol to 1,2-PDO

Tianyu Hu <sup>a</sup>, Zhiquan Yu <sup>a\*</sup>, Shan Liu <sup>a</sup>, Bingyu Liu, <sup>a</sup> Zhichao Sun <sup>a</sup>, Ying-Ya Liu <sup>a</sup>, Anjie Wang <sup>a,b</sup>, Yao Wang <sup>a,b\*</sup>

<sup>a</sup> State Key Laboratory of Fine Chemicals, School of Chemical Engineering, Dalian University of Technology, Dalian 116024, China

<sup>b</sup> Liaoning Key Laboratory of Petrochemical Technology and Equipment, Dalian University of Technology, Dalian 116024, China

Corresponding author:

Dr. Zhiquan Yu, School of Chemical Engineering, Dalian University of Technology

2 Linggong Road, Dalian 116024, P. R. China

Tel: +86-411-84986124

E-mail: yuzhiquan@dlut.edu.cn

Prof. Yao Wang, School of Chemical Engineering, Dalian University of Technology

2 Linggong Road, Dalian 116024, P. R. China

Tel: +86-411-84986500

E-mail: wangyao@dlut.edu.cn

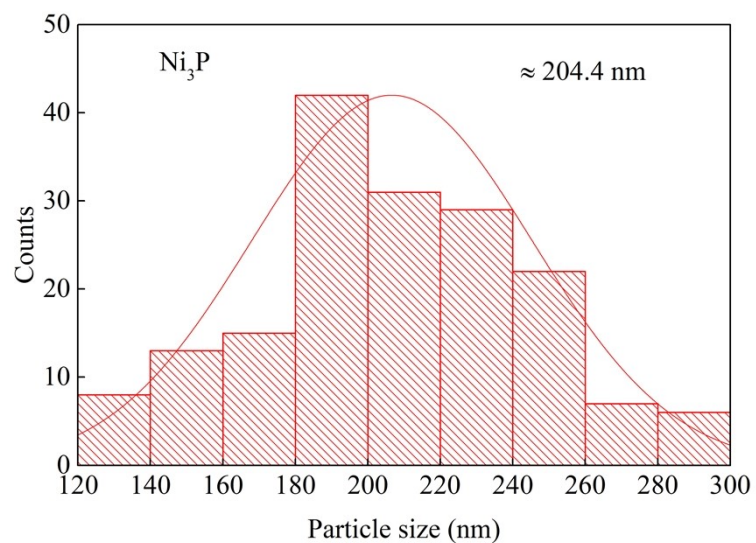

**Fig. S1.** Particle size distributions of  $\text{Ni}_3\text{P}$  catalyst.

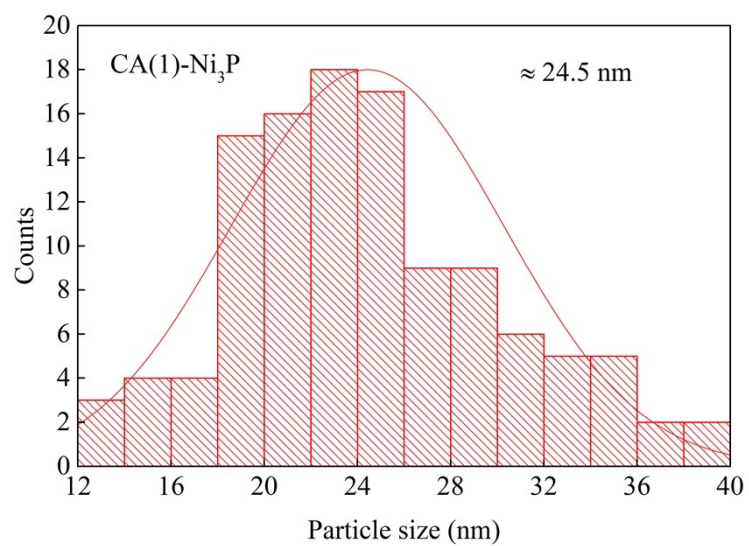

**Fig. S2.** Particle size distributions of CA(1)- $\text{Ni}_3\text{P}$  catalyst.

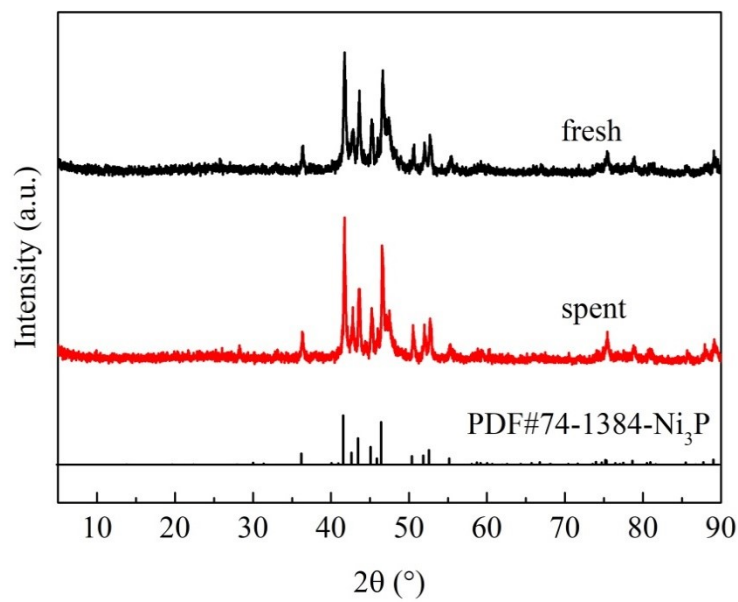

**Fig. S3.** The XRD patterns of fresh and spent CA(1)-Ni<sub>3</sub>P catalysts.

**Table S1.** Recyclability of the CA(1)-Ni<sub>3</sub>P catalyst in APR and glycerol hydrogenolysis.

| Cycles | Conv. (%) | Selectivity (%) |        |     |      |      |                 |                               |                               |      |                 |        | H <sub>2</sub> (mmol) |
|--------|-----------|-----------------|--------|-----|------|------|-----------------|-------------------------------|-------------------------------|------|-----------------|--------|-----------------------|
|        |           | 1,2-PDO         | Acetol | EG  | EtOH | 1-PO | CH <sub>4</sub> | C <sub>2</sub> H <sub>6</sub> | C <sub>3</sub> H <sub>8</sub> | CO   | CO <sub>2</sub> | Others |                       |
| 1      | 74.6      | 43.2            | 16.0   | 5.7 | 4.3  | 5.6  | 0.7             | 0.4                           | 0.1                           | 0.2  | 11.8            | 11.9   | 2.1                   |
| 2      | 52.2      | 19.0            | 26.1   | 2.4 | 12.4 | 13.0 | 0.8             | 0.6                           | 0.1                           | 1.5  | 2.5             | 21.7   | 1.0                   |
| 3      | 17.4      | 14.5            | 56.1   | 0   | 17.4 | 1.6  | <0.1            | <0.1                          | <0.1                          | <0.1 | 0.1             | 10.4   | 0.5                   |

Reaction conditions: glycerol 2 g, water 18 g, CA(1)-Ni<sub>3</sub>P 0.2 g, 220 °C, 0.5 MPa N<sub>2</sub>, 8 h, 750 rpm.
